# Supplementary material for: In Vitro Gastrointestinal Digestion of Various Sweet Potato Leaves: Polyphenol Profiles, Bioaccessibility and Bioavailability Elucidation
Source: MDPI journal article supplement (doi:10.3390/antiox13050520), 2024-04-26
Supplement: s1 [file s1]

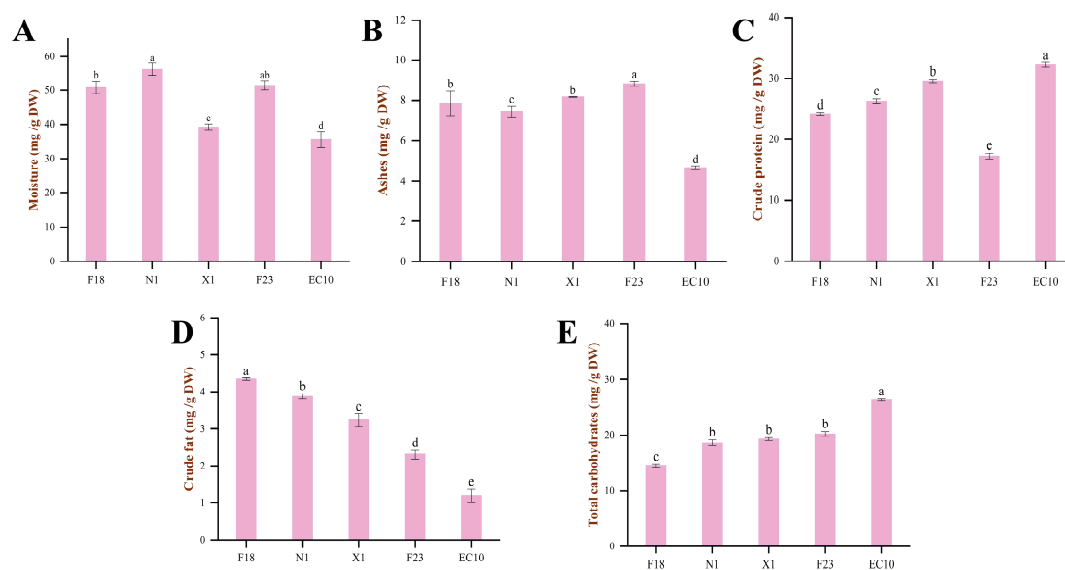

**Figure S1** The chemical composition of SPLs, (A) Moisture; (B) Ashes; (C) Crude protein; (D) Crude fat; (E) Total carbohydrates. Values were mean  $\pm$  standard deviation,  $n=3$ . The lowercase letters indicate significant differences between species, respectively, by the Tukey test ( $p < 0.05$ )

**Table S1.** Compounds identification, compound formula, retention times, measured m/z of molecular and mass fragments (MS<sup>2</sup>) in SPL.

| NO. | Compound                                 | Rt<br>[min] | Compound<br>formula                             | Measured<br>m/z | MS/MS<br>m/z                                      | Reference |
|-----|------------------------------------------|-------------|-------------------------------------------------|-----------------|---------------------------------------------------|-----------|
| 1   | 5-O-Caffeoylquinic acid (5-CQA)          | 11.090      | C <sub>16</sub> H <sub>18</sub> O <sub>9</sub>  | 353.0886        | 191.0555, 179.0555, 173.0342, 161.0105, 135.0441  | 1         |
| 2   | 3-O-Caffeoylquinic acid (3-CQA)          | 13.195      | C <sub>16</sub> H <sub>18</sub> O <sub>9</sub>  | 353.0886        | 191.0555, 179.0555, 173.0447, 135.0441            | 1         |
| 3   | 4-O-Caffeoylquinic acid (4-CQA)          | 14.328      | C <sub>16</sub> H <sub>18</sub> O <sub>9</sub>  | 353.0886        | 191.0555, 179.0342, 173.0447, 135.0441            | 1,2       |
| 4   | Caffeic acid (CA)                        | 15.309      | C <sub>9</sub> H <sub>8</sub> O <sub>4</sub>    | 179.0339        | 135.0480, 134. 0152                               | 1,2       |
| 5   | Quercetin-3-O-hexoside                   | 19.024      | C <sub>24</sub> H <sub>22</sub> O <sub>15</sub> | 463.0458        | 300.0328, 301.0228, 271.0468, 255.0513, 179.0490  | 3         |
| 6   | 3,4-Dicaffeoylquinic acid (3,4-CQA)      | 21.028      | C <sub>25</sub> H <sub>24</sub> O <sub>12</sub> | 515.1197        | 353.0891, 335.0794 ,191.0555, 179.0343, 135.0440  | 1,3       |
| 7   | 3,5-Dicaffeoylquinic acid (3,5-CQA)      | 21.453      | C <sub>25</sub> H <sub>24</sub> O <sub>12</sub> | 515.1197        | 353.0891, 335.0794,191.0555, 179.0343, 135.0440   | 1         |
| 8   | Quinine acid                             | 21.788      | C <sub>11</sub> H <sub>9</sub> NO <sub>3</sub>  | 191.0561        | 191.0243, 85.0273, 126.8311, 93.3069, 87.1055     | 1         |
| 9   | 4,5-Dicaffeoylquinic acid (4,5-CQA)      | 22.097      | C <sub>25</sub> H <sub>24</sub> O <sub>12</sub> | 515.1197        | 353.0749, 335.0794,191.0555, 173.0343 135.0440    | 1         |
| 10  | 3-Caffeoyl-4-feruloylquinic acid         | 24.086      | C <sub>26</sub> H <sub>26</sub> O <sub>12</sub> | 529.1351        | 367.1043, 353.0910, 193.0535, 191.0573, 179.0412, | 1         |
| 11  | Quercetin                                | 25.019      | C <sub>15</sub> H <sub>10</sub> O <sub>7</sub>  | 301.0354        | 151.0214, 121.0983, 107.0258, 179.0583            | 1         |
| 12  | 3,4,5-Tricaffeoylquinic acid (3,4,5-CQA) | 26.483      | C <sub>34</sub> H <sub>30</sub> O <sub>15</sub> | 677.1521        | 515.0723, 353.0328                                | 1,4       |

Abbreviations: Rt (retention time)

**Table S2.** Contents changes of the phenolic profile in SPLs after each digestion stage, different lowercase letter indicates significant difference between species by the Turkey test ( $p < 0.05$ ).

|                            |      | CQAs                    |                        |                         |                         |                         |                         |                        | Phenolic                 |                         |
|----------------------------|------|-------------------------|------------------------|-------------------------|-------------------------|-------------------------|-------------------------|------------------------|--------------------------|-------------------------|
|                            |      | 3-CQA                   | 4-CQA                  | 5-CQA                   | 3,4-CQA                 | 3,5-CQA                 | 4,5-CQA                 | 3,4,5-CQA              | CA                       | Quinine acid            |
| Undigested<br>mg CGE /g DW | F18  | 1.66±0.04 <sup>ab</sup> | 0.27±0.01 <sup>a</sup> | 0.25±0.02 <sup>b</sup>  | 1.39±0.03 <sup>b</sup>  | 2.78±0.03 <sup>b</sup>  | 0.29±0.03 <sup>b</sup>  | 0.14±0.03 <sup>a</sup> | 0.44±0.01 <sup>b</sup>   | nd                      |
|                            | N1   | 1.46±0.03 <sup>b</sup>  | 0.28±0.03 <sup>a</sup> | 0.33±0.04 <sup>a</sup>  | 0.83±0.03 <sup>d</sup>  | 2.71±0.01 <sup>b</sup>  | 0.26±0.02 <sup>b</sup>  | 0.14±0.01 <sup>a</sup> | 0.14±0.05 <sup>d</sup>   | nd                      |
|                            | X1   | 1.25±0.05 <sup>c</sup>  | 0.27±0.02 <sup>a</sup> | 0.25±0.03 <sup>b</sup>  | 0.86±0.01 <sup>cd</sup> | 2.54±0.03 <sup>c</sup>  | 0.25±0.01 <sup>b</sup>  | 0.14±0.02 <sup>a</sup> | 0.39±0.01 <sup>c</sup>   | nd                      |
|                            | F23  | 1.06±0.01 <sup>d</sup>  | 0.26±0.01 <sup>a</sup> | 0.29±0.01 <sup>a</sup>  | 0.99±0.03 <sup>c</sup>  | 2.28±0.01 <sup>d</sup>  | 0.53±0.02 <sup>a</sup>  | 0.09±0.02 <sup>b</sup> | 0.33±0.04 <sup>c</sup>   | nd                      |
|                            | EC10 | 1.93±0.02 <sup>a</sup>  | 0.30±0.01 <sup>a</sup> | 0.25±0.00 <sup>b</sup>  | 1.88±0.01 <sup>a</sup>  | 3.45±0.04 <sup>a</sup>  | 0.24±0.01 <sup>b</sup>  | 0.14±0.03 <sup>a</sup> | 0.55±0.02 <sup>a</sup>   | nd                      |
| Oral<br>µg CGE /g DW       | F18  | 9.63±0.04 <sup>b</sup>  | nd                     | nd                      | 10.01±0.03 <sup>b</sup> | 9.45±0.01 <sup>c</sup>  | 3.89±0.02 <sup>c</sup>  | nd                     | 67.804±0.01 <sup>b</sup> | 10.13±0.02 <sup>a</sup> |
|                            | N1   | 5.99±0.02 <sup>c</sup>  | nd                     | 6.27±0.03 <sup>b</sup>  | 8.05±0.01 <sup>c</sup>  | 9.21±0.03 <sup>c</sup>  | 1.92±0.04 <sup>d</sup>  | 0.87±0.02 <sup>b</sup> | 383.82±0.03 <sup>a</sup> | nd                      |
|                            | X1   | 6.38±0.01 <sup>c</sup>  | nd                     | 6.30±0.02 <sup>b</sup>  | nd                      | 68.58±0.04 <sup>a</sup> | 6.35±0.02 <sup>b</sup>  | nd                     | 18.76±0.02 <sup>d</sup>  | nd                      |
|                            | F23  | 9.12±0.02 <sup>b</sup>  | 9.20±0.01 <sup>a</sup> | 11.57±0.05 <sup>a</sup> | 12.08±0.03 <sup>a</sup> | 8.89±0.03 <sup>c</sup>  | 21.62±0.02 <sup>a</sup> | 6.71±0.05 <sup>a</sup> | 10.73±0.04 <sup>c</sup>  | nd                      |
|                            | EC10 | 10.62±0.03 <sup>a</sup> | nd                     | 6.20±0.04 <sup>b</sup>  | nd                      | 11.04±0.02 <sup>b</sup> | 6.55±0.01 <sup>b</sup>  | 6.13±0.01 <sup>a</sup> | 66.94±0.03 <sup>c</sup>  | nd                      |

|                               |      |                          |                          |                          |                          |                         |                         |                         |                           |                         |
|-------------------------------|------|--------------------------|--------------------------|--------------------------|--------------------------|-------------------------|-------------------------|-------------------------|---------------------------|-------------------------|
| Gastric<br>µg CGE /g DW       | F18  | 4.48±0.02 <sup>c</sup>   | nd                       | 9.38±0.03 <sup>c</sup>   | nd                       | 3.89±0.04 <sup>d</sup>  | 4.29±0.01 <sup>c</sup>  | 5.45±0.02 <sup>c</sup>  | 215.64±0.02 <sup>b</sup>  | 5.45±0.03 <sup>b</sup>  |
|                               | N1   | 11.83±0.01 <sup>b</sup>  | 9.66±0.03 <sup>a</sup>   | 11.09±0.04 <sup>b</sup>  | 9.05±0.01 <sup>a</sup>   | 7.86±0.02 <sup>c</sup>  | 6.47±0.03 <sup>b</sup>  | 9.16±0.01 <sup>b</sup>  | 1.75±0.04 <sup>c</sup>    | nd                      |
|                               | X1   | nd                       | nd                       | nd                       | nd                       | 11.43±0.03 <sup>a</sup> | 9.98±0.04 <sup>a</sup>  | 35.14±0.02 <sup>a</sup> | 90.44±0.01 <sup>c</sup>   | nd                      |
|                               | F23  | nd                       | nd                       | nd                       | 9.80±0.01 <sup>a</sup>   | 9.80±0.05 <sup>b</sup>  | 9.59±0.02 <sup>a</sup>  | nd                      | 53.30±0.03 <sup>d</sup>   | nd                      |
|                               | EC10 | 18.72±0.02 <sup>a</sup>  | nd                       | 16.43±0.01 <sup>a</sup>  | nd                       | 11.73±0.03 <sup>a</sup> | 9.22±0.04 <sup>a</sup>  | 9.56±0.05 <sup>b</sup>  | 379.56±0.02 <sup>a</sup>  | 14.11±0.04 <sup>a</sup> |
| Intestinal<br>µg CGE /g DW    | F18  | 16.10±0.03 <sup>b</sup>  | nd                       | 9.25±0.02 <sup>b</sup>   | 30.58±0.02 <sup>b</sup>  | 6.95±0.04 <sup>d</sup>  | 9.34±0.01 <sup>b</sup>  | 9.63±0.03 <sup>a</sup>  | 18.30±0.05 <sup>b</sup>   | nd                      |
|                               | N1   | 9.78±0.02 <sup>d</sup>   | 3.70±0.05 <sup>c</sup>   | 5.97±0.03 <sup>d</sup>   | 10.79±0.02 <sup>c</sup>  | 12.74±0.01 <sup>a</sup> | 9.85±0.03 <sup>b</sup>  | 9.63±0.04 <sup>a</sup>  | 18.06±0.01 <sup>b</sup>   | nd                      |
|                               | X1   | 6.50±0.02 <sup>c</sup>   | 9.18±0.02 <sup>b</sup>   | 7.40±0.01 <sup>c</sup>   | 10.32±0.04 <sup>c</sup>  | 9.14±0.03 <sup>c</sup>  | 9.65±0.01 <sup>b</sup>  | nd                      | nd                        | nd                      |
|                               | F23  | 14.20±0.05 <sup>c</sup>  | 9.20±0.02 <sup>b</sup>   | 9.45±0.03 <sup>b</sup>   | 10.69±0.02 <sup>c</sup>  | 10.72±0.03 <sup>b</sup> | 9.33±0.04 <sup>b</sup>  | nd                      | nd                        | nd                      |
|                               | EC10 | 188.18±0.04 <sup>a</sup> | 172.17±0.01 <sup>a</sup> | 198.43±0.03 <sup>a</sup> | 123.14±0.05 <sup>a</sup> | 9.32±0.01 <sup>c</sup>  | 31.63±0.02 <sup>a</sup> | 7.17±0.01 <sup>b</sup>  | 2110.24±0.03 <sup>a</sup> | nd                      |
| post-dialysis<br>µg CGE /g DW | F18  | 7.30±0.01 <sup>b</sup>   | nd                       | 5.65±0.02 <sup>d</sup>   | 12.09±0.04 <sup>b</sup>  | nd                      | 3.42±0.03 <sup>c</sup>  | 4.55±0.03 <sup>b</sup>  | 14.34±0.02 <sup>b</sup>   | nd                      |
|                               | N1   | 5.64±0.02 <sup>d</sup>   | 0.50±0.03 <sup>d</sup>   | 4.82±0.04 <sup>d</sup>   | 4.40±0.04 <sup>d</sup>   | 4.34±0.05 <sup>b</sup>  | 7.77±0.02 <sup>b</sup>  | 5.79±0.05 <sup>a</sup>  | 13.22±0.01 <sup>c</sup>   | nd                      |
|                               | X1   | 3.63±0.01 <sup>c</sup>   | 6.08±0.04 <sup>c</sup>   | 6.15±0.03 <sup>c</sup>   | 7.05±0.01 <sup>c</sup>   | 3.81±0.05 <sup>b</sup>  | 6.70±0.03 <sup>b</sup>  | 3.63±0.02 <sup>c</sup>  | 6.08±0.04 <sup>d</sup>    | nd                      |
|                               | F23  | 7.62±0.03 <sup>b</sup>   | 6.93±0.04 <sup>b</sup>   | 8.15±0.01 <sup>b</sup>   | 6.51±0.02 <sup>c</sup>   | 4.33±0.03 <sup>b</sup>  | 6.84±0.02 <sup>b</sup>  | nd                      | nd                        | nd                      |
|                               | EC10 | 112.93±0.02 <sup>a</sup> | 118.56±0.05 <sup>a</sup> | 127.03±0.04 <sup>a</sup> | 97.44±0.03 <sup>a</sup>  | 5.87±0.01 <sup>a</sup>  | 28.30±0.02 <sup>a</sup> | 4.83±0.05 <sup>b</sup>  | 1611.98±0.03 <sup>a</sup> | nd                      |

Abbreviations: nd (not detected)

## References:

1. Fu, Z.F.; Tu, Z.C.; Zhang, L.; Wang, H.; Wen, Q.H.; Huang, T. Antioxidant activities and polyphenols of sweet potato (*Ipomoea batatas* L.) leaves extracted with solvents of various polarities. *Food Biosci* 2016, 15, 11-18. doi: 10.1016/j.fbio.2016.04.004
2. Lu, X.F.; Zhou, Y.; Ren, Y.P.; Zhang J. Improved sample treatment for the determination of flavonoids and polyphenols in sweet potato leaves by ultra performance convergence chromatography-tandem mass spectrometry. *J. Pharm. Biomed. Anal* 2019, 169, 245-253. doi:10.1016/j.jpba.2019.03.003
3. Sun, R.; Kan, J.; Cai, H.; Hong, J.; Jin, C.; Zhang M. In vitro and in vivo ameliorative effects of polyphenols from purple potato leaves on renal injury and associated inflammation induced by hyperuricemia. *J Food Biochem* 2022, 46(2), e14049. doi: 10.1111/jfbc.14049
4. Zhang, L.; Tu Z.C.; Wang, H.; Fu, Z.F.; Wen, Q.H.; Chang, H.X.; Huang, X.Q. Comparison of different methods for extracting polyphenols from *Ipomoea batatas* leaves, and identification of antioxidant constituents by HPLC-QTOF-MS2. *Food Res. Int* 2015, 70, 101-109. doi: 10.1016/j.foodres.2015.01.012
